# Supplementary material for: Genetic and Clinical Characteristics of Korean Chronic Lymphocytic Leukemia Patients with High Frequencies of MYD88 Mutations
Source: MDPI journal article supplement (doi:10.3390/ijms24043177), 2023-02-06
Supplement: s1 [file s1]

## Supplemental Materials

### Supplemental Tables

**Supplemental Table S1.** Gene targets of SM CLL/lymphoma panel

|                             |                                                                                                                               |
|-----------------------------|-------------------------------------------------------------------------------------------------------------------------------|
| Transcription regulators    | <i>ARID1B, ARID2, BCORL1, CREBBP, KMT2A, KMT2D, KDM6A, TET2</i>                                                               |
| TLR signaling pathway       | <i>MYD88</i>                                                                                                                  |
| NF-κB signaling pathway     | <i>BIRC3, CARD11, MAP2K1, TNFAIP3, TRAF3</i>                                                                                  |
| BCR signaling pathway       | <i>CD28, CD79A, CD79B, TNFRSF14</i>                                                                                           |
| MAPK signaling pathway      | <i>BRAF, KRAS, NF1, NRAS</i>                                                                                                  |
| DNA damage and repair       | <i>ATM, TP53</i>                                                                                                              |
| RNA splicing and processing | <i>SF3B1</i>                                                                                                                  |
| Others                      | <i>APC, CCND1, CCND2, CHD8, DIS3, DNMT3A, EZH2, FOXO1, GNA13, ID3, IDH2, NOTCH1, NOTCH2, RHOA, STAT3, STAT5B, TCF3, ZAP70</i> |

Abbreviations: TLR, Toll-like receptor; MAPK, mitogen-activated protein kinase; **SM CLL**, **St. Mary's chronic lymphocytic leukemia**

**Supplemental Table S2.** List of detected mutations

See the file "CLL Supplementary Table 2.xlsx"

**Supplemental Table S3.** Univariate and multivariate **Cox proportional hazards** regression analyses of genetic factors for time to treatment

| Variables               | Univariate analysis |              |          | Multivariate analysis |              |          |
|-------------------------|---------------------|--------------|----------|-----------------------|--------------|----------|
|                         | HR                  | (95% CI)     | <i>p</i> | HR                    | (95% CI)     | <i>p</i> |
| Somatic hypermutation   | 0.40                | (0.19-0.84)  | 0.016    | 0.57                  | (0.23-1.42)  | 0.226    |
| Isolated del(13q)       | 1.93                | (0.74-5.01)  | 0.178    |                       |              |          |
| Trisomy 12              | 1.67                | (0.62-4.50)  | 0.313    |                       |              |          |
| Complex karyotype       | 1.74                | (0.70-4.33)  | 0.237    |                       |              |          |
| <i>ATM</i> abnormality  | 1.86                | (0.72-4.80)  | 0.203    |                       |              |          |
| <i>TP53</i> abnormality | 2.95                | (1.22-7.12)  | 0.016    | 2.86                  | (1.17-7.00)  | 0.021    |
| <i>NOTCH1</i> mutation  | 4.51                | (1.87-10.91) | <0.001   | 4.99                  | (1.49-16.69) | 0.009    |
| <i>MYD88</i> mutation   | 0.68                | (0.34-1.39)  | 0.292    |                       |              |          |

Abbreviations: HR, hazard ratio; CI, confidence interval

**Supplemental Table S4.** Univariate and multivariate **Cox proportional hazards** regression analyses of genetic factors for overall survival

| Variables               | Univariate analysis |              |          | Multivariate analysis |             |          |
|-------------------------|---------------------|--------------|----------|-----------------------|-------------|----------|
|                         | HR                  | (95% CI)     | <i>p</i> | HR                    | (95% CI)    | <i>p</i> |
| Somatic hypermutation   | 0.16                | (0.04-0.60)  | 0.006    | 0.50                  | (0.10-2.51) | 0.403    |
| Isolated del(13q)       | 1.39                | (0.14-13.50) | 0.774    |                       |             |          |
| Trisomy 12              | 1.42                | (0.17-11.64) | 0.741    |                       |             |          |
| Complex karyotype       | 1.45                | (0.16-13.05) | 0.738    |                       |             |          |
| <i>ATM</i> abnormality  | 1.69                | (0.20-14.15) | 0.630    |                       |             |          |
| <i>TP53</i> abnormality | 7.26                | (1.73-30.58) | 0.007    | 7.07                  | (1.56-32.1) | 0.001    |
| <i>NOTCH1</i> mutation  | 7.21                | (1.45-35.88) | 0.016    | 3.47                  | (0.44-27.6) | 0.239    |
| <i>MYD88</i> mutation   | 0.56                | (0.12-2.64)  | 0.463    |                       |             |          |

Abbreviations: HR, hazard ratio; CI, confidence interval
